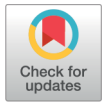

# A Safe and Simple Algorithm for Adding and Adjusting Mealtime Insulin to Basal-Only Therapy

Mary L. Johnson,<sup>1</sup> Richard M. Bergenstal,<sup>1</sup>  
Brian L. Levy,<sup>2</sup> and Darlene M. Dreon<sup>2</sup>

Numerous studies have shown that early initiation of intensive treatment significantly improves  $\beta$ -cell function and long-term glycemic control in individuals with type 2 diabetes (1–4). However, despite national and international clinical guidelines that recommend escalation of therapy if individualized glycemic targets are not met within 3–6 months (5), transition to basal-only insulin therapy and then to intensive insulin management is often delayed despite significant and sustained hyperglycemia. As reported by Khunti et al. (6), the time to treatment intensification from noninsulin medications to basal-only insulin therapy is often delayed by up to 7 years in adults with type 2 diabetes with A1C levels  $\geq 8.0\%$ , and the average time to transition of patients from basal-only insulin to basal-plus-mealtime insulin is 3.2 years.

Failure to intensify therapy when clinically indicated, often referred to as “therapeutic inertia,” can lead to extended periods of hyperglycemia and the potential for poor microvascular and macrovascular outcomes (7). Because initiating and titrating insulin is often complex (8), many clinicians are reluctant to intensify insulin therapy in their patients. The primary obstacles to timely transition to intensive insulin therapy are inadequate knowledge/training, lack of confidence in optimizing insulin regimens, time and resource constraints, and suboptimal treatment adherence (9–15).

In many situations, particularly in primary care settings, clinicians lack ready access to support staff (e.g., diabetes

educators) who can deliver the necessary education and training to patients (15). For patients, key factors affecting treatment adherence include the need for multiple injections, understanding of the purpose and importance of their medications, depression, diabetes-related distress, low treatment satisfaction, side effects, poor self-efficacy, cost, and overall burden of daily self-management with insulin therapy (16,17), all of which pose significant barriers to insulin intensification for both patients and clinicians (17,18). Calculating accurate mealtime insulin doses is a common challenge for patients because of inadequate training (19,20). Deficits in numeracy are common among individuals with diabetes, strongly associated with poor glycemic control (21–24), and compounded by low competency in carbohydrate counting (20,25,26).

Given the growing prevalence of diabetes (27) and the increasing proportion of adults with type 2 diabetes who are not meeting their glycemic targets (28–32), new approaches to initiating and intensifying insulin therapy in type 2 diabetes are needed. In this article, we describe a safe and simple insulin titration algorithm that addresses many of the obstacles that clinicians and patients encounter when adding mealtime insulin to a basal-only insulin regimen.

## Basal and Mealtime Insulin Titration Algorithm

### Concept

The algorithm follows a simple, systematic approach that facilitates simultaneous daily mealtime insulin adjustments with weekly adjustments of both mealtime and basal insulin doses. It should be noted that “mealtime” in this algorithm refers to rapid-acting insulin and “basal” refers to 24-hour long-acting basal insulin.

Patients are asked to check their premeal glucose at each meal and their bedtime glucose with traditional fingerstick blood glucose monitoring (BGM) or, if they are using continuous glucose monitoring (CGM), use the premeal/bedtime glucose value displayed in their CGM reader or smartphone app. This novel approach requires neither carbohydrate counting nor postmeal

<sup>1</sup>International Diabetes Center, Park Nicollet, Minneapolis, MN; <sup>2</sup>Calibra Medical, Johnson & Johnson Diabetes Care Companies, Wayne, PA

Corresponding author: Mary L. Johnson, Mary.L.Johnson@ParkNicollet.com

This article contains supplementary material online at <https://doi.org/10.2337/figshare.19386251>.

<https://doi.org/10.2337/cd21-0137>

©2022 by the American Diabetes Association. Readers may use this article as long as the work is properly cited, the use is educational and not for profit, and the work is not altered. More information is available at <https://www.diabetesjournals.org/journals/pages/license>.

## PRACTICAL POINTERS

glucose testing. Throughout the week, patients use the premeal and bedtime blood glucose values and meal size to adjust doses at each meal. At the end of each week, patients review the data retrospectively to make adjustments in their basal insulin doses and to calculate changes in the “starting” doses for each meal, from which they will make their premeal adjustments. Using this approach, individuals with type 2 diabetes benefit from safe and effective physiologic therapy for achieving optimal glycemic control (33,34).

### *Evidence of Safety and Efficacy*

The safety and efficacy of the basal and mealtime insulin titration algorithm was demonstrated in a 48-week, randomized, multicenter, multinational open-label, parallel, two-arm interventional trial involving 278 adults with type 2 diabetes, A1C 7.5–11%, who were currently treated with basal-only insulin therapy (35). Inclusion required that participants be taking  $\geq 0.3$  units/kg/day of insulin, an indication that addition of mealtime insulin was needed. Participants were randomized (1:1) to one of two treatment arms that used different insulin delivery methods to add mealtime insulin before all meals to existing evening administration of insulin glargine: 139 participants used the CeQur Simplicity patch insulin delivery device (CeQur, Marlborough, MA, formerly of Calibra Medical, Wayne, PA) with insulin aspart, and 139 used the NovoRapid Flex Pen with insulin aspart (Novo Nordisk Pharmaceuticals, Plainsboro, NJ).

Unlike traditional insulin pumps, the CeQur Simplicity is designed for manual administration of mealtime insulin only. The small wearable device (65 × 35 × 8 mm) can be worn on the abdomen for up to 3 days (36). The patch holds up to 200 units of mealtime insulin and delivers a 2-unit dose via a subcutaneous cannula with each simultaneous click of two buttons on either side of the device. For example, to deliver 10 units of mealtime insulin before a meal, a patient would click the buttons five times.

Participants were instructed on the details of using the algorithm by going through a sample participant’s weekly diary and were given their own diary, which contained all the elements of the algorithm, to complete. After the first week of their new insulin regimen, they had a phone visit with a member of the study team who reviewed their diary and provided any additional training needed before they changed their baseline doses for the next week. The weekly brief touchpoints continued through the first month and then occurred biweekly during the second

month, with the expectation that patients would continue to implement weekly titrations. At each subsequent protocol visit, the diaries were reviewed with patients.

Mean A1C at baseline was 8.7% for the patch group and 8.6% for the pen group. As early as week 12, participants in both groups achieved a significant reduction in A1C from baseline ( $-1.4\%$ ,  $P < 0.0001$ ), with an even greater reduction by week 24 ( $-1.7$  and  $-1.6\%$  from baseline, respectively;  $P < 0.0001$ ), which was sustained through week 44. Importantly, the incidence of severe hypoglycemia was extremely low, with only three incidents reported in each study group. In a subgroup analysis of 97 participants who wore a CGM device in blinded mode (37), investigators assessed glycemic control using the recommended CGM metrics for percentage of time in range (TIR;  $>70\%$  at 70–180 mg/dL), time above range (TAR;  $<25\%$  at  $>180$  mg/dL), and time below range (TBR;  $<4\%$  at  $<70$  mg/dL) (38). At week 24, both groups had increased their TIR (to 74.1 and 75.2%, respectively) and had marked reductions in TAR (21.1 and 19.7%, respectively) but with a slight increase in TBR (4.7 and 5.1%, respectively) (all  $P < 0.0001$ ). As expected, the addition of mealtime insulin resulted in weight gain in both groups by 24 weeks (3.9 and 4.0 kg, respectively) and by 44 weeks (5.1 and 5.3 kg, respectively).

### *Calculating Starting Doses for Basal and Mealtime Insulin*

The first step in the process of transitioning from a basal-only to a basal and mealtime insulin regimen is determining a patient’s starting insulin doses. To do this, first divide the patient’s current total daily dose (TDD) of basal insulin in half. Half of the TDD is given as the starting basal insulin dose, administered in the evening. The other half is given as the starting mealtime insulin dose, split evenly among meals. Figure 1 presents an example of how the starting doses are calculated with a patient currently treated with 48 units of long-acting glargine insulin. In patients with A1C  $<9.0\%$ , reduce the TDD by 10% before splitting it into basal and mealtime insulin doses to decrease the potential for hypoglycemia.

### *Daily Mealtime Insulin Dose Adjustments*

Mealtime insulin dose adjustments may be made for every meal and any snack. These adjustments can be to either reduce insulin (subtract), increase insulin (add), or make no adjustment (no change) to the current prescribed dose based on the patient’s premeal glucose value and estimated meal size: smaller than usual (small), usual size (usual), or larger than usual (large)

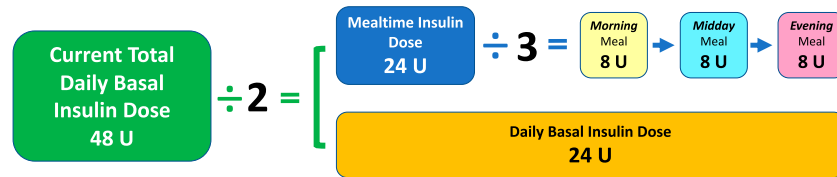

**FIGURE 1** Example showing how to calculate starting doses for basal and mealtime insulin. U, units.

(Table 1). Note that we specifically chose not to use the term “medium” because patients’ definitions of small, medium, and large can vary dramatically, whereas comparing a meal size to smaller than usual or larger than usual is customized to the individual. The meal size was also not based on the carbohydrate content of the meal because participants were not instructed in carbohydrate counting; rather, they were simply instructed in what foods contained carbohydrates to be able to treat any possible hypoglycemia.

The example presented in Figure 2 illustrates how a morning mealtime insulin dose would be calculated based on a usual mealtime dose (8 units).

### Weekly Basal Insulin Dose Adjustments

Basal insulin dose adjustments are made at the end of each week and used for the nightly bedtime basal insulin dose throughout the next week. The dose adjustments are made after a retrospective review of morning glucose results recorded during the prior week. As shown in Table 2, these adjustments are made based on glucose values that indicate an increased risk for hypoglycemia or hyperglycemia. The example presented in Figure 3 illustrates how the basal insulin dose is calculated for the following week.

### Weekly Mealtime Insulin Dose Adjustments

Mealtime insulin dose adjustments are also made at the end of each week and used for each subsequent week. These are calculated based on the prior week’s midday mealtime (for morning meal), evening mealtime (for midday meal), and bedtime glucose (for evening meal) patterns from the previous week as shown in Table 3. These newly calculated doses are then adjusted for each meal during the week based on meal size and glucose level at the time of the meal (see daily mealtime insulin dose adjustments above).

The example presented in Figure 4 illustrates how mealtime starting doses are calculated for the following week. In this case, we have calculated the new dose for the morning meal using the glucose values from the current week’s midday meal. The same process is used for all meals.

### Considerations for Implementing the Algorithm

When introducing the algorithm to patients, it is important to explain that achieving glycemic targets is a gradual process and that they should not expect to see immediate results. For the algorithm to work, patients must adhere to the dose recommendations provided. If

**TABLE 1** Mealtime Insulin Adjustments According to Premeal Glucose and Meal Size

| Adjustment for Premeal Glucose |                  |   | Adjustment for Meal/Snack Size             |                                  |
|--------------------------------|------------------|---|--------------------------------------------|----------------------------------|
| Glucose, mg/dL                 | Adjustment       |   | Meal/Snack Size                            | Adjustment                       |
| <70                            | Subtract 2 units | + | Meal: Small                                | Subtract 2 units                 |
| 70-180                         | No change        |   | Meal: Usual                                | No change                        |
| >180                           | Add 2 units      |   | Meal: Large                                | Add 2 units                      |
|                                | Not applicable   |   | Snack containing carbohydrates: ≤1 serving | Take no insulin                  |
|                                | Not applicable   |   | Snack containing carbohydrates: >1 serving | Take 2 units before eating snack |

These cut points vary slightly from those used in the study to align with new consensus guidelines (35).

## PRACTICAL POINTERS

| New Starting Dose = 8 Morning Meal |          |               |                          |      |                               |              |    |
|------------------------------------|----------|---------------|--------------------------|------|-------------------------------|--------------|----|
| Date                               | BG Value | Starting Dose | ± BG Correction (Circle) | ±    | Meal Size Correction (Circle) | = Total Dose |    |
| 5/1                                | 197      | 8             | Higher than 180          | +2 U | Usual                         | +0 U         | 10 |

1. Patient obtains and documents a BG reading before the meal and circles the appropriate BG Correction and Meal Size Correction.
2. On this day, the premeal BG is higher than 180 mg/dL (A) and the meal size is usual (B).
3. This prompts the patient to add 2U to the starting dose and administer a 10U dose for the meal (C).

| New Starting Dose = 8 Morning Meal |          |               |                          |      |                               |              |    |
|------------------------------------|----------|---------------|--------------------------|------|-------------------------------|--------------|----|
| Date                               | BG Value | Starting Dose | ± BG Correction (Circle) | ±    | Meal Size Correction (Circle) | = Total Dose |    |
| 5/1                                | 197      | 8             | Higher than 180          | +2 U | Usual                         | +0 U         | 10 |
| 5/2                                | 139      | 8             | 70-180                   | +0 U | Small                         | -2 U         | 6  |

1. On the next day, the patient obtains and documents the premeal BG and, again, circles the appropriate BG Correction and Meal Size Correction.
2. On this day, the premeal BG is between 70 and 180 mg/dL (D) and the meal size is smaller than usual (E).
3. This prompts the patient to subtract 2U from the starting dose and administer a 6U dose for the meal (F).

**FIGURE 2** Example showing how to make daily mealtime dose adjustments. BG, blood glucose; U, units.

patients experience sustained hypoglycemia or hyperglycemia despite following the dose adjustment schedule, they should contact their health care team.

Because some patients may find that making their daily mealtime adjustments becomes second nature and may stop tracking their blood glucose results and doses, it is important that clinicians emphasize that these data are needed for appropriate weekly adjustments to both their premeal starting mealtime dose adjustments and basal insulin dose adjustments. The protocol specifies that a weekly change can be made only if there are a minimum of three blood glucose measurements obtained that

would affect that specific time point (e.g., three blood glucose measurements before evening meals would allow a change in the next week's midday mealtime insulin starting dose). A blank diary for tracking adjustments is provided in Supplementary Materials.

## Discussion

Insulin regimens that use long-acting basal insulin in combination with rapid-acting insulin analogs at mealtimes provide an effective, physiological approach to achieving optimal glycemic control in people with type 2 diabetes who require insulin

**TABLE 2** Basal Insulin Dose Adjustment Based on Morning Blood Glucose Pattern From Previous Week

| Glucose Results Before Morning Meal or Upon Waking                                                             | Bedtime Basal Insulin Dose Adjustment |
|----------------------------------------------------------------------------------------------------------------|---------------------------------------|
| Two or more morning glucose values <70 mg/dL                                                                   | Subtract 4 units                      |
| One morning glucose value <70 mg/dL                                                                            | No change                             |
| No morning glucose values <70 mg/dL <u>AND</u><br>Three or more morning glucose values >130 mg/dL              | Add 2 units                           |
| <u>OR</u><br>No morning glucose values <70 mg/dL <u>AND</u><br>Three or more morning glucose values >180 mg/dL | <u>OR</u><br>Add 4 units              |
| If none of the above apply                                                                                     | No change                             |

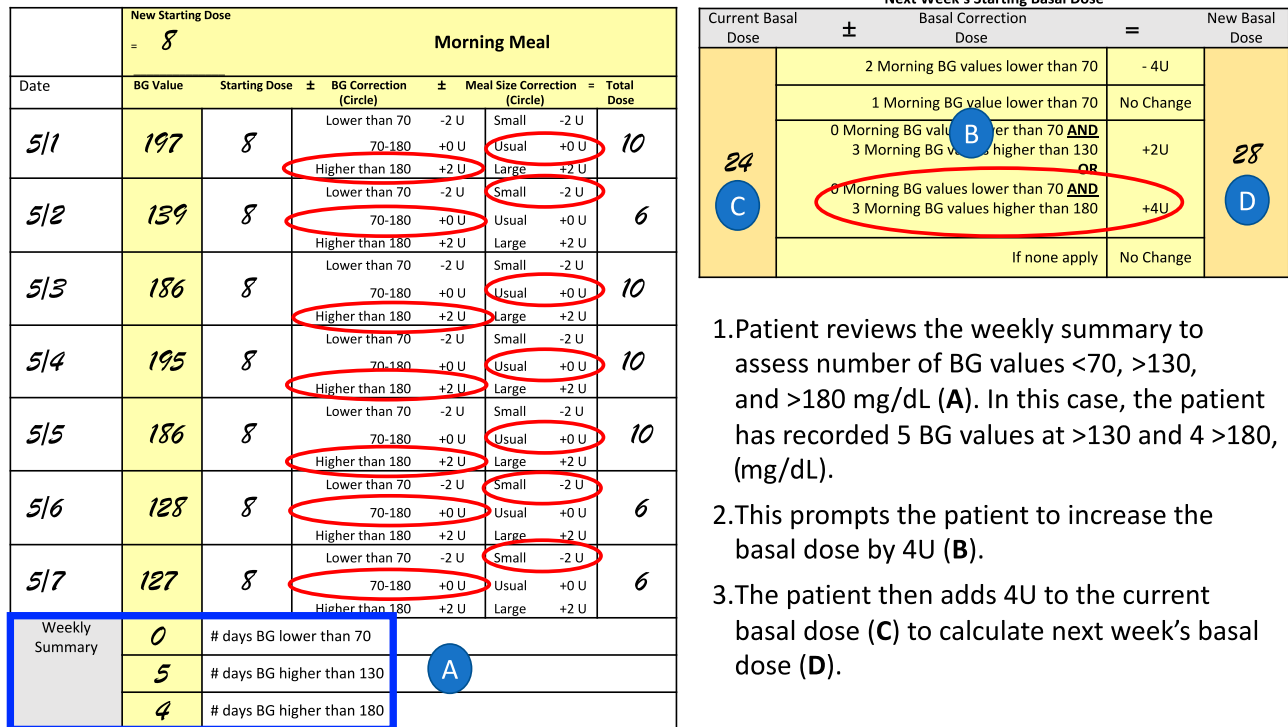

FIGURE 3 Example showing how to adjust basal insulin doses. BG, blood glucose; U, units.

1. Patient reviews the weekly summary to assess number of BG values <70, >130, and >180 mg/dL (A). In this case, the patient has recorded 5 BG values at >130 and 4 >180, (mg/dL).
2. This prompts the patient to increase the basal dose by 4U (B).
3. The patient then adds 4U to the current basal dose (C) to calculate next week's basal dose (D).

therapy (33,34). However, current approaches to these regimens are often too complex for both patients and clinicians.

By using individualized meal sizes (i.e., small, usual, and large) in conjunction with immediate and retrospective glucose data, the insulin titration algorithm outlined above provides a simple, holistic approach that facilitates simultaneous adjustments of mealtime and basal insulin doses. This approach not only shortens the amount of time needed to safely achieve optimal glycemic control, but also encourages persistent, simultaneous dose adjustments to maintain desired glucose levels. This strategy keeps mealtime and basal insulin in balance, thus avoiding over-insulinization with either mealtime or basal insulin, either of which can lead to hypoglycemia. For example, if patients are physically active, too much basal insulin onboard can lead to hypoglycemia during the day (39), whereas too much mealtime insulin, particularly at the evening meal, increases the risk for overnight hypoglycemia (40).

As reported, participants in both the patch and pen study groups achieved clinically and statistically significant reductions by as early as 12 weeks (-1.4%) and continued to experience improved glycemic control

throughout the study through persistent use of the algorithm (35).

Moreover, this algorithm means that patients do not have to wait for their clinician to make needed dose adjustments, thereby addressing the issue of therapeutic inertia and facilitating more timely achievement of optimal glycemic control. However, it is important that clinicians and patients review the diary together to make sure patients understand what to do. Instructing patients in the use of the algorithm also creates opportunities for clinicians to learn more about initiating and adjusting mealtime insulin.

Importantly, whereas insulin therapy is generally associated with lower patient satisfaction and reduced quality of life (41), findings from our study showed high treatment adherence in both the patch and pen groups (79 and 78%, respectively) and significant improvements in several patient-reported outcome measures (35), suggesting that use of this simplified insulin titration algorithm will likely improve medication adherence in real-world settings (42).

It should be noted that participants in our study based their insulin adjustments on glucose values

**TABLE 3** Weekly Starting Mealtime Dose Adjustments

| Glucose Test Results Before Midday Meal                                                           | Morning Mealtime Dose Adjustment |
|---------------------------------------------------------------------------------------------------|----------------------------------|
| Two or more midday glucose values <70 mg/dL                                                       | Subtract 2 units                 |
| One midday glucose value <70 mg/dL                                                                | No change                        |
| No midday glucose values <70 mg/dL <u>AND</u><br>Three or more midday glucose values >130 mg/dL   | Add 2 units                      |
| If none of the above apply                                                                        | No change                        |
| Glucose Test Results Before Evening Meal                                                          | Midday Mealtime Dose Adjustment  |
| Two or more evening glucose values <70 mg/dL                                                      | Subtract 2 units                 |
| One evening glucose value <70 mg/dL                                                               | No change                        |
| No evening glucose values <70 mg/dL <u>AND</u><br>Three or more evening glucose values >130 mg/dL | Add 2 units                      |
| If none of the above apply                                                                        | No change                        |
| Glucose Test Results at Bedtime                                                                   | Evening Mealtime Dose Adjustment |
| Two or more bedtime glucose values <70 mg/dL                                                      | Subtract 2 units                 |
| One bedtime glucose value <70 mg/dL                                                               | No change                        |
| No bedtime glucose values <70 mg/dL <u>AND</u><br>Three or more bedtime glucose values >130 mg/dL | Add 2 units                      |
| If none of the above apply                                                                        | No change                        |

obtained from traditional fingerstick BGM. However, the algorithm can be easily applied to individuals who use CGM. In addition to eliminating the need for multiple daily fingersticks, CGM provides an additional level of safety by providing information about glucose trends, direction and velocity of changing glucose, and alerts that warn patients of current and impending adverse glycemic events. Although BGM is the most common glucose testing method currently in use by people with type 2 diabetes, with growing positive clinical trial and real-world study results of CGM in individuals with insulin-treated type 2 diabetes, use of CGM within this population continues to expand.

Although the algorithm can be used regardless of glucose monitoring method (BGM or CGM), an important consideration relevant to persistent treatment adherence and quality of life is the method used for insulin delivery. Although participants in both of our study groups achieved equally significant A1C reductions,

patient-reported outcomes revealed that overall satisfaction with the insulin delivery system and satisfaction with ease of use were notably higher with the patch than with the insulin pen. Differences in quality-of-life measures such as ability to dose without attracting attention, painless mealtime insulin delivery, ease of administration, and lifestyle flexibility also favored patch use. There was a significantly higher preference for using the patch device than the pen among study participants who used the patch for the full 44 weeks. A higher preference was also reported by pen users who crossed over to patch use for only 4 weeks at week 44 (35).

Moreover, study clinicians also reported favorable ratings for the patch for all measures of preference. Specifically, 91.1% of health care providers preferred the patch to the pen to advance their patients with type 2 diabetes to a basal-and-mealtime-insulin regimen, and 89% reported that it took <30 minutes to train participants to use the patch (35).

| New Starting Dose |                         | Midday Meal                                               |                                        |              |  |  |
|-------------------|-------------------------|-----------------------------------------------------------|----------------------------------------|--------------|--|--|
| = 8               |                         |                                                           |                                        |              |  |  |
| BG Value          | Starting Dose           | ± BG Correction (Circle)                                  | ± Meal Size Correction (Circle)        | = Total Dose |  |  |
| 154               | 8                       | Lower than 70 -2 U<br>70-180 +0 U<br>Higher than 180 +2 U | Small -2 U<br>Usual +0 U<br>Large +2 U | 8            |  |  |
| 63                | 8                       | Lower than 70 -2 U<br>70-180 +0 U<br>Higher than 180 +2 U | Small -2 U<br>Usual +0 U<br>Large +2 U | 6            |  |  |
| 76                | 8                       | Lower than 70 -2 U<br>70-180 +0 U<br>Higher than 180 +2 U | Small -2 U<br>Usual +0 U<br>Large +2 U | 10           |  |  |
| 68                | 8                       | Lower than 70 -2 U<br>70-180 +0 U<br>Higher than 180 +2 U | Small -2 U<br>Usual +0 U<br>Large +2 U | 8            |  |  |
| 64                | 8                       | Lower than 70 -2 U<br>70-180 +0 U<br>Higher than 180 +2 U | Small -2 U<br>Usual +0 U<br>Large +2 U | 6            |  |  |
| 160               | 8                       | Lower than 70 -2 U<br>70-180 +0 U<br>Higher than 180 +2 U | Small -2 U<br>Usual +0 U<br>Large +2 U | 8            |  |  |
| 121               | 8                       | Lower than 70 -2 U<br>70-180 +0 U<br>Higher than 180 +2 U | Small -2 U<br>Usual +0 U<br>Large +2 U | 10           |  |  |
| 3                 | # days BG 70 or Lower   |                                                           |                                        |              |  |  |
| 2                 | # days BG 130 or higher |                                                           |                                        |              |  |  |
| 0                 | # days BG 180 or higher |                                                           |                                        |              |  |  |

| Next Week's Starting Morning Mealtime Dose |                                                                               |                    |
|--------------------------------------------|-------------------------------------------------------------------------------|--------------------|
| Current Morning Dose                       | ± Morning Correction Dose                                                     | = New Morning Dose |
| 8                                          | 2 or more Midday BG values at lower than 70                                   | -2U                |
| 8                                          | 1 Midday BG at lower than 70                                                  | No Change          |
| 8                                          | 0 Midday BG values at lower than 70 AND 3 Midday BG values at higher than 130 | +2U                |
| 8                                          | If none apply                                                                 | No Change          |

1. Patient reviews the weekly summary to assess number of BG values <70 and >130 mg/dL (A). In this case, the patient has recorded 3 BG values <70 mg/dL.
2. This prompts the patient to reduce the morning mealtime dose by 2U (B).
3. The patient then subtracts 2U from the current morning mealtime dose (C) to calculate next week's morning mealtime dose (D).

FIGURE 4 Example showing how to adjust the starting dose for morning meals the following week. BG, blood glucose; U, units.

Given the large and growing proportion of patients with type 2 diabetes who are not meeting their glycemic targets (28–32), innovative approaches to initiating and titrating basal-plus-mealtime insulin therapy are needed. When used in conjunction with a simplified insulin delivery technology such as a mealtime insulin patch device, this insulin algorithm may facilitate more frequent intensification of therapy and result in significant improvements in medication adherence, treatment satisfaction, patient quality of life, and clinical outcomes.

**ACKNOWLEDGMENTS**

The authors thank Christopher G. Parkin, MS, of CGParkin Communications, Inc., for editorial assistance in developing this manuscript.

**FUNDING**

Funding for the development of this manuscript was provided by CeQur.

**DUALITY OF INTEREST**

M.L.J. has received research support from or participated in clinical trials supported by Abbott, Dexcom, Johnson & Johnson, Hygieia, Insulet, Lilly, Medtronic, the National Institute of Diabetes and Digestive and Kidney Diseases

(NIDDK), Novo Nordisk, and Sanofi. Her employer (the non-profit HealthPartners Institute) contracts for her services, and no personal income goes to her. R.M.B. has received research support, consulted, or been on a scientific advisory board for Abbott Diabetes Care, Ascensia, CeQur Corporation, DexCom, Hygieia, Insulet, Johnson & Johnson, Lilly, Medtronic, Novo Nordisk, Onduo, Roche, Sanofi, United Health-care, and Zealand. His technology research is funded in part by the National Institutes of Health/NIDDK. His employer (the nonprofit HealthPartners Institute) contracts for his services, and no personal income goes to him. B.L.L. has received medical consulting services from CeQur, Nevro Corp., Digma Medical., and LifeScan. No other potential conflicts of interest relevant to this article were reported.

**AUTHOR CONTRIBUTIONS**

All of the authors conceived the presented idea, contributed to the writing of the manuscript, and made extensive comments, criticism, and revisions to the manuscript. All reviewed and approved the final version. M.L.J. is the guarantor of this work and, as such, had full access to all of the data in the study and takes responsibility for the integrity of the data and the accuracy of the data analysis.

**REFERENCES**

1. Li Y, Xu W, Liao Z, et al. Induction of long-term glycemic control in newly diagnosed type 2 diabetic patients is associated with improvement of beta-cell function. *Diabetes Care* 2004;27:2597–2602

## PRACTICAL POINTERS

2. Retnakaran R, Drucker DJ. Intensive insulin therapy in newly diagnosed type 2 diabetes. *Lancet* 2008;371:1725–1726
3. Park S, Choi SB. Induction of long-term normoglycemia without medication in Korean type 2 diabetes patients after continuous subcutaneous insulin infusion therapy. *Diabetes Metab Res Rev* 2003;19:124–130
4. Weng J, Li Y, Xu W, et al. Effect of intensive insulin therapy on beta-cell function and glycaemic control in patients with newly diagnosed type 2 diabetes: a multicentre randomised parallel-group trial. *Lancet* 2008;371:1753–1760
5. Davies MJ, D'Alessio DA, Fradkin J, et al. Management of hyperglycemia in type 2 diabetes, 2018: a consensus report by the American Diabetes Association (ADA) and the European Association for the Study of Diabetes (EASD). *Diabetes Care* 2018;41:2669–2701
6. Khunti K, Gomes MB, Pocock S, et al. Therapeutic inertia in the treatment of hyperglycaemia in patients with type 2 diabetes: a systematic review. *Diabetes Obes Metab* 2018;20:427–437
7. Khunti K, Seidu S. Therapeutic inertia and the legacy of dysglycemia on the microvascular and macrovascular complications of diabetes. *Diabetes Care* 2019;42:349–351
8. Petznick AM. Identifying and addressing barriers to insulin acceptance and adherence in patients with type 2 diabetes mellitus. *J Am Osteopath Assoc* 2013;113(Suppl. 2):S6–S16
9. Harris SB, Kapor J, Lank CN, Willan AR, Houston T. Clinical inertia in patients with T2DM requiring insulin in family practice. *Can Fam Physician* 2010;56:e418–e424
10. Zafar A, Davies M, Azhar A, Khunti K. Clinical inertia in management of T2DM. *Prim Care Diabetes* 2010;4:203–207
11. Allen JD, Curtiss FR, Fairman KA. Nonadherence, clinical inertia, or therapeutic inertia? *J Manag Care Pharm* 2009;15:690–695
12. Ross SA. Breaking down patient and physician barriers to optimize glycemic control in type 2 diabetes. *Am J Med* 2013;126(Suppl. 1):S38–S48
13. Cuddihy RM, Philis-Tsimikas A, Nazeri A. Type 2 diabetes care and insulin intensification: is a more multidisciplinary approach needed? Results from the MODIFY survey. *Diabetes Educ* 2011;37:111–123
14. Elliott DJ, Robinson EJ, Sanford M, Herrman JW, Riesenber LA. Systemic barriers to diabetes management in primary care: a qualitative analysis of Delaware physicians. *Am J Med Qual* 2011;26:284–290
15. Kalra S, Ghosal S, Shah P. Consensus on bridges for barriers to insulin therapy. *J Assoc Physicians India* 2017;65(Suppl.):23–30
16. Kumar N, Unnikrishnan B, Thapar R, et al. Distress and its effect on adherence to antidiabetic medications among type 2 diabetes patients in coastal South India. *J Nat Sci Biol Med* 2017;8:216–220
17. Polonsky WH, Henry RR. Poor medication adherence in type 2 diabetes: recognizing the scope of the problem and its key contributors. *Patient Prefer Adherence* 2016;10:1299–1307
18. Peyrot M, Bailey TS, Childs BP, Reach G. Strategies for implementing effective mealtime insulin therapy in type 2 diabetes. *Curr Med Res Opin* 2018;34:1153–1162
19. Trief PM, Cibula D, Rodriguez E, Akel B, Weinstock RS. Incorrect insulin administration: a problem that warrants attention. *Clin Diabetes* 2016;34:25–33
20. Meade LT, Rushton WE. Accuracy of carbohydrate counting in adults. *Clin Diabetes* 2016;34:142–147
21. Cavanaugh K, Huizinga MM, Wallston KA, et al. Association of numeracy and diabetes control. *Ann Intern Med* 2008;148:737–746
22. Huizinga MM, Carlisle AJ, Cavanaugh KL, et al. Literacy, numeracy, and portion-size estimation skills. *Am J Prev Med* 2009;36:324–328
23. Marden S, Thomas PW, Sheppard ZA, Knott J, Lueddeke J, Kerr D. Poor numeracy skills are associated with glycaemic control in type 1 diabetes. *Diabet Med* 2012;29:662–669
24. Zaugg SD, Dogbey G, Collins K, et al. Diabetes numeracy and blood glucose control: association with type of diabetes and source of care. *Clin Diabetes* 2014;32:152–157
25. Ziegler R, Cavan DA, Cranston I, et al. Use of an insulin bolus advisor improves glycaemic control in multiple daily insulin injection (MDI) therapy patients with suboptimal glycaemic control: first results from the ABACUS trial. *Diabetes Care* 2013;36:3613–3619
26. Shapira G, Yodfat O, HaCohen A, Feigin P, Rubin R. Bolus guide: a novel insulin bolus dosing decision support tool based on selection of carbohydrate ranges. *J Diabetes Sci Technol* 2010;4:893–902
27. Centers for Disease Control and Prevention. *National Diabetes Statistics Report, 2020: Estimates of Diabetes and Its Burden in the United States*. Available from <https://www.cdc.gov/diabetes/pdfs/data/statistics/national-diabetes-statistics-report.pdf>. Accessed 29 February 2020
28. Carls G, Huynh J, Tuttle E, Yee J, Edelman SV. Achievement of glycated hemoglobin goals in the US remains unchanged through 2014. *Diabetes Ther* 2017;8:863–873
29. Raccach D, Chou E, Colagiuri S, et al. A global study of the unmet need for glycemic control and predictor factors among patients with type 2 diabetes mellitus who have achieved optimal fasting plasma glucose control on basal insulin. *Diabetes Metab Res Rev* 2017;33:e2858
30. Stone MA, Charpentier G, Doggen K, et al.; GUIDANCE Study Group. Quality of care of people with type 2 diabetes in eight European countries: findings from the Guideline Adherence to Enhance Care (GUIDANCE) study. *Diabetes Care* 2013;36:2628–2638
31. Brath H, Paldánus PM, Bader G, Kolaczynski WM, Nilsson PM. Differences in glycemic control across world regions: a post-hoc analysis in patients with type 2 diabetes mellitus on dual antidiabetes drug therapy. *Nutr Diabetes* 2016;6:e217



32. Fang M, Wang D, Coresh J, Selvin E. Trends in diabetes treatment and control in U.S. adults, 1999–2018. *N Engl J Med* 2021;384:2219–2228
33. DeWitt DE, Hirsch IB. Outpatient insulin therapy in type 1 and type 2 diabetes mellitus: scientific review. *JAMA* 2003;289:2254–2264
34. Edelman S, Dailey G, Flood T, Kuritzky L, Renda S. A practical approach for implementation of a basal-prandial insulin therapy regimen in patients with type 2 diabetes. *Osteopath Med Prim Care* 2007;1:9
35. Bergenstal RM, Peyrot M, Dreon DM, et al.; Calibra Study Group. Implementation of basal-bolus therapy in type 2 diabetes: a randomized controlled trial comparing bolus insulin delivery using an insulin patch with an insulin pen. *Diabetes Technol Ther* 2019;21:273–285
36. Dreon DM, Hannon TM, Cross B, et al. Laboratory and benchtop performance of a mealtime insulin-delivery system. *J Diabetes Sci Technol* 2018;12:817–827
37. Bergenstal RM, Johnson ML, Aroda VR, et al. Comparing patch vs pen bolus insulin delivery in type 2 diabetes using continuous glucose monitoring metrics and profiles. *J Diabetes Sci Technol*. Online ahead of print on 19 May 2021 (doi: 10.1177/19322968211016513)
38. Battelino T, Danne T, Bergenstal RM, et al. Clinical targets for continuous glucose monitoring data interpretation: recommendations from the International Consensus on Time in Range. *Diabetes Care* 2019;42:1593–1603
39. Chun J, Strong J, Urquhart S. Insulin initiation and titration in patients with type 2 diabetes. *Diabetes Spectr* 2019;32:104–111
40. McCall AL. Insulin therapy and hypoglycemia. *Endocrinol Metab Clin North Am* 2012;41:57–87
41. Bradley C, Eschwège E, de Pablos-Velasco P, et al. Predictors of quality of life and other patient-reported outcomes in the PANORAMA multinational study of people with type 2 diabetes. *Diabetes Care* 2018;41:267–276
42. Barbosa CD, Balp MM, Kulich K, Germain N, Rofail D. A literature review to explore the link between treatment satisfaction and adherence, compliance, and persistence. *Patient Prefer Adherence* 2012;6:39–48
